# Supplementary material for: Intra-tumour genetic heterogeneity and poor chemoradiotherapy response in cervical cancer
Source: PubMed Central journal article supplement (PMC3031882; doi:10.1038/sj.bjc.6605971), 2010-11-09
Supplement: 6605971x1.pdf [file 6605971x1.pdf]

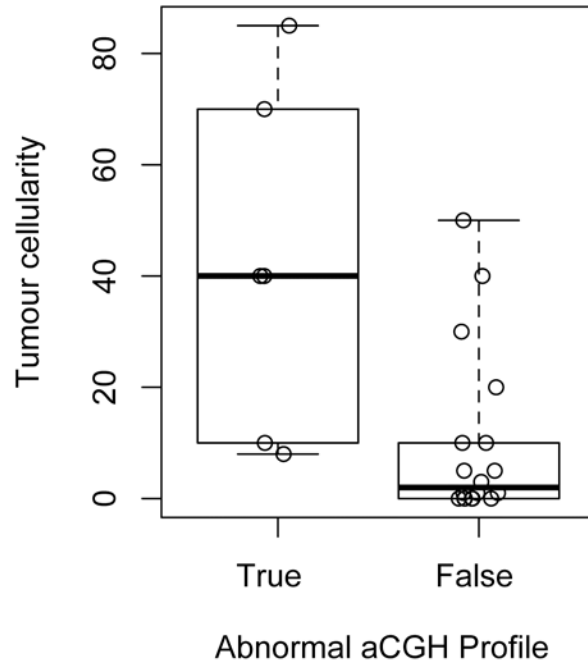

**Supplementary Figure 1:** Correlation between tumour cellularity by histopathological assessment and an abnormal genomic profile identified by array CGH.
