# Supplementary material for: Intra-tumour genetic heterogeneity and poor chemoradiotherapy response in cervical cancer
Source: PubMed Central journal article supplement (PMC3031882; doi:10.1038/sj.bjc.6605971), 2010-11-09
Supplement: 6605971x3.pdf [file 6605971x3.pdf]

## Case 14

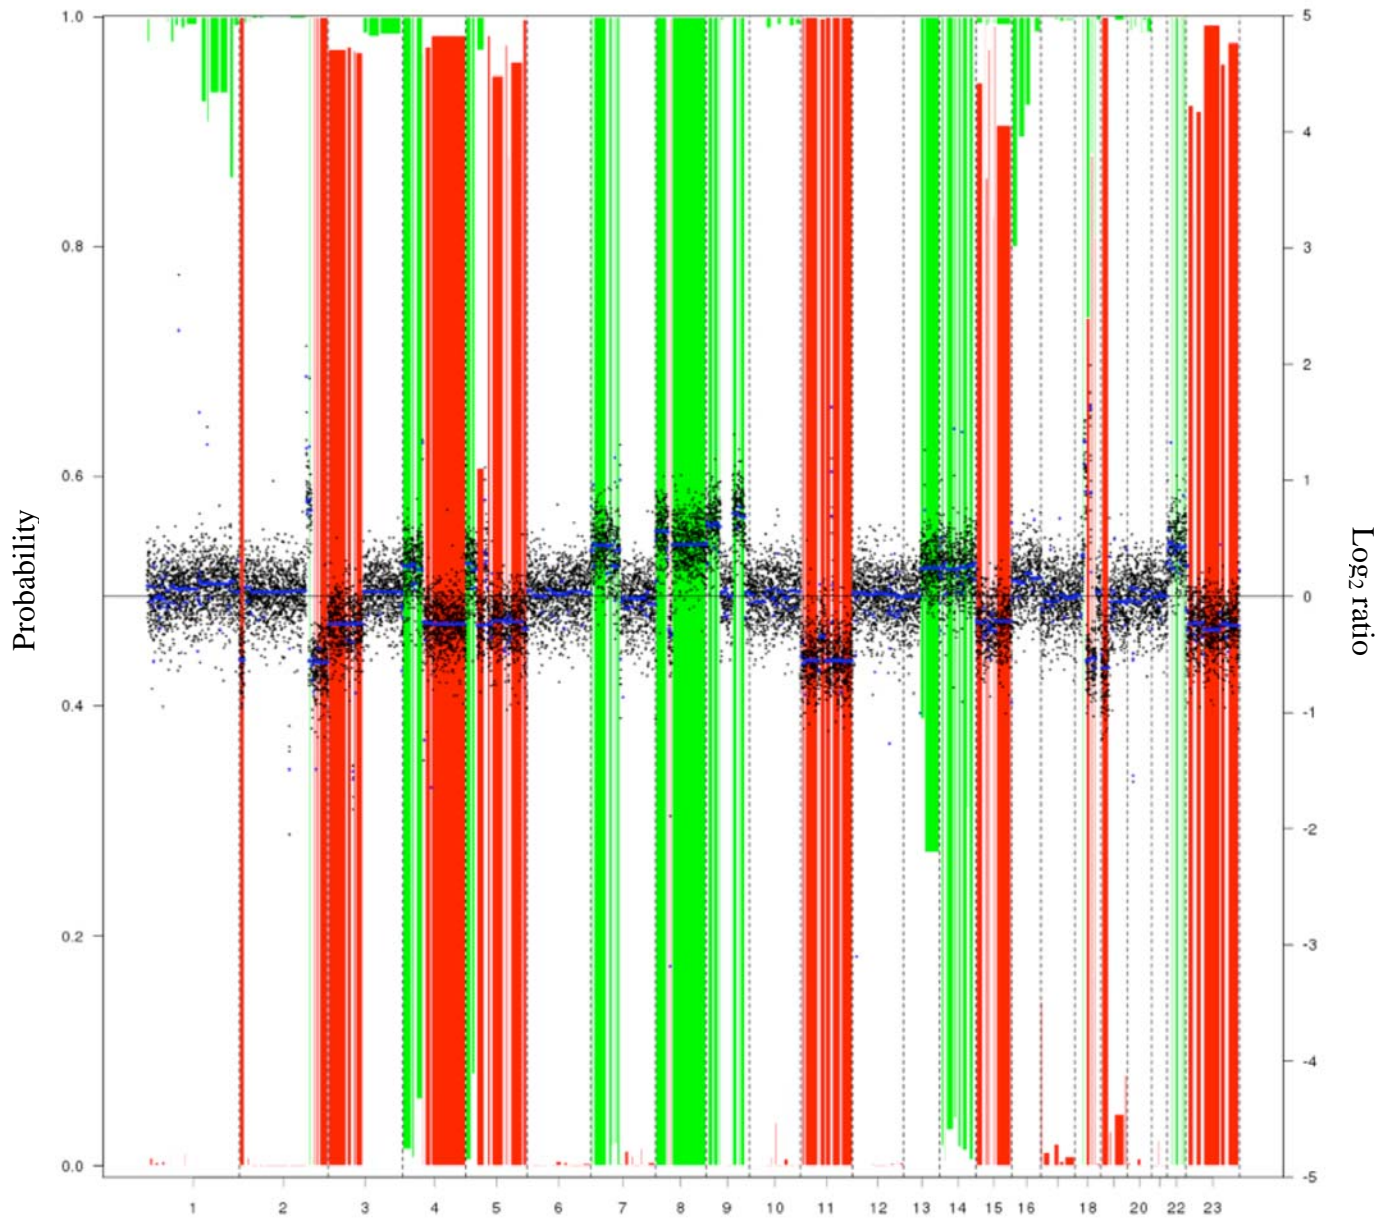

**Supplementary Figure 3:** Whole genome array CGH of case 14 showing extensive genomic rearrangement. Vertical bars indicate probability of loss (red) or gain (green). Segmentation is shown in blue. To improve the clarity of the whole genome plot every 10<sup>th</sup> probe is plotted.
